# Supplementary material for: Inhibition of the signal peptidase complex blocks cleavage of HTLV-1 ORF-I encoded p12 to p8 and impairs virus transmission
Source: Research Square preprint supplement (doi:10.21203/rs.3.rs-6064775/v1), 2025-03-17
Supplement: Supplementary file 1 [file f6cebd436b6ad1fcbdbfb017.pdf]

**Supplementary Figures**

**Inhibition of the signal peptidase complex blocks cleavage of HTLV-1 ORF1 encoded p12 to p8 and impairs virus transmission**

Florian Simon<sup>1</sup>, Norbert Donhauser<sup>1</sup>, Laura M. Kemeter<sup>1</sup>, Franziska Wittdorf<sup>1</sup>,  
Sebastian Millen<sup>1</sup>, Heinrich Sticht<sup>2, 3</sup>, Andrea K. Thoma-Kress<sup>1, 3, \*</sup>

<sup>1</sup> Institute of Clinical and Molecular Virology, Friedrich-Alexander-Universität  
Erlangen-Nürnberg (FAU), Erlangen, Germany.

<sup>2</sup> Institute of Biochemistry, Friedrich-Alexander-Universität Erlangen-Nürnberg (FAU),  
Erlangen, Germany.

<sup>3</sup> FAU Profile Center Immunomedicine (FAU I-MED), Friedrich-Alexander-Universität  
Erlangen-Nürnberg (FAU), Erlangen, Germany.

\* corresponding author; [andrea.thoma-kress@uk-erlangen.de](mailto:andrea.thoma-kress@uk-erlangen.de)

A

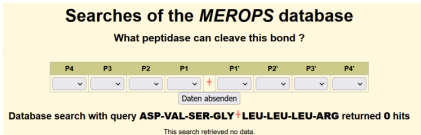

B

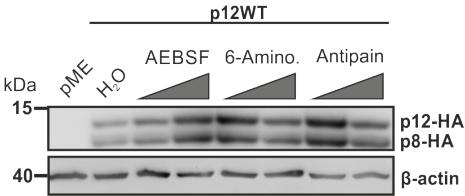

C

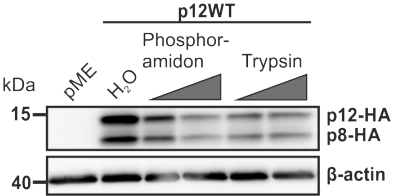

D

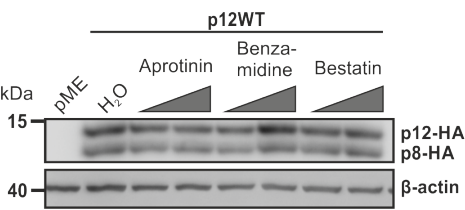

E

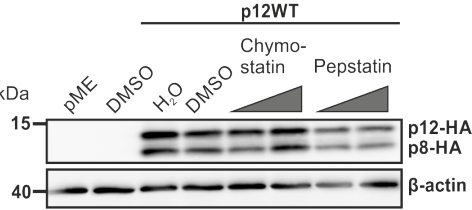

F

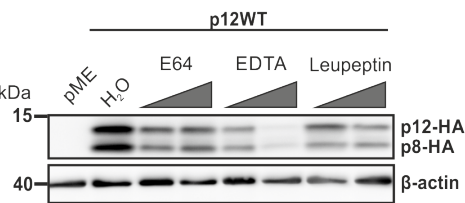

G

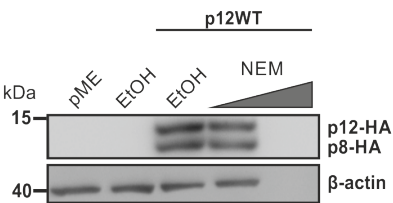

H

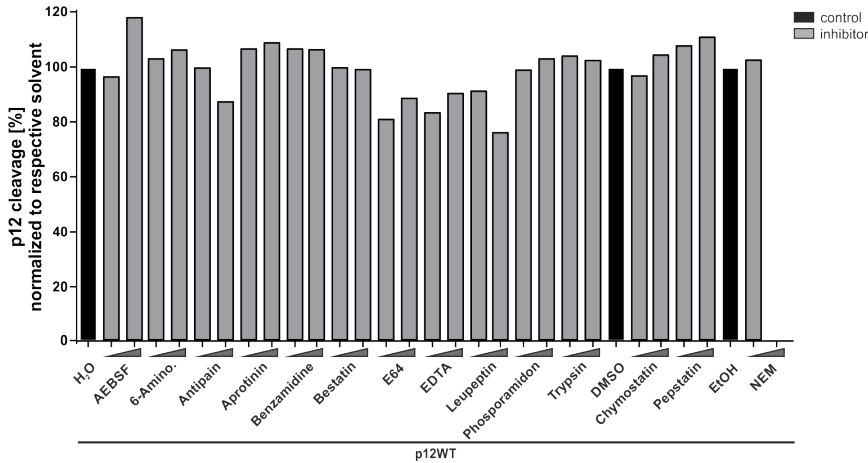

I

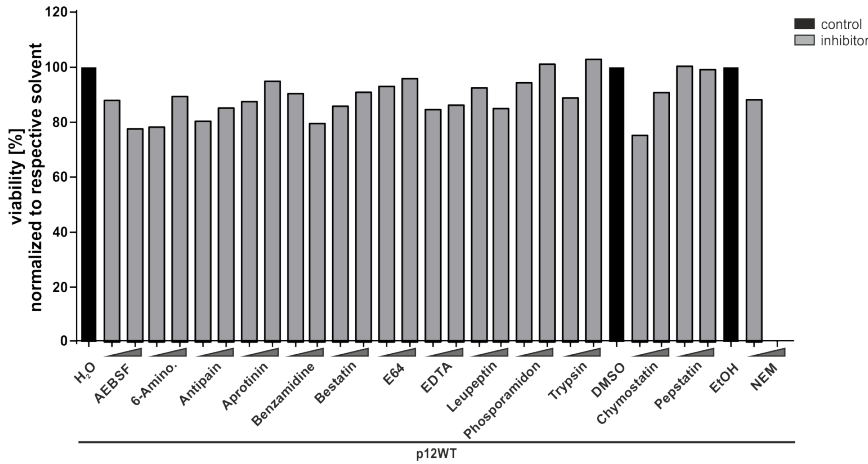

**Supplementary Figure 1: Commercial protease inhibitors do not interfere with p12 cleavage in Jurkat.**

**(A)** The p12 cleavage site was analysed with the MEROPS data base. **(B-I)** At 4 h prior electroporation, Jurkat T-cells were treated with two concentrations of one of the protease inhibitors (AEBSF: 0.01 mM, 0.1 mM; 6-Aminohexanoic acid: 0.025 mg/ml, 0.25 mg/ml; Antipain dihydrochloride: 1  $\mu$ M, 100  $\mu$ M; Aprotinin: 10 nM, 800 nM; Benzamidine: 0.5 mM, 4 mM; Bestatin: 4  $\mu$ M, 40  $\mu$ M; Chymostatin: 10  $\mu$ M, 100  $\mu$ M; E64: 1  $\mu$ M, 10  $\mu$ M; EDTA: 0.1 mM, 1 mM; NEM: 0.01 mM, 0.1 mM; Leupeptin: 10  $\mu$ M, 100  $\mu$ M; Pepstatin: 0.5  $\mu$ g/ml, 1  $\mu$ g/ml; Phosphoramidon: 1  $\mu$ M, 10  $\mu$ M; Trypsin: 10  $\mu$ g/ml, 100  $\mu$ g/ml). Next, cells were electroporated with 50  $\mu$ g HA-tagged pME-p12WT or pME and treated with the respective protease inhibitor for 24 h. Cells were lysed with the respective protease inhibitor added to corresponding lysis buffer and analysed via **(B-G)** immunoblotting with anti-HA and anti- $\beta$ -actin antibodies. **(H)** Densitometric analysis of p12 and p8 specific bands was performed. p12 cleavage was calculated as  $p8/(p12+p8)$  and normalized to respective solvent control. The mean of two independent experiments is depicted. **(I)** Cells were stained with propidium iodide (PI). Cell viability was analysed via flow cytometry and normalized to respective solvent control. The mean of two independent experiments is depicted.

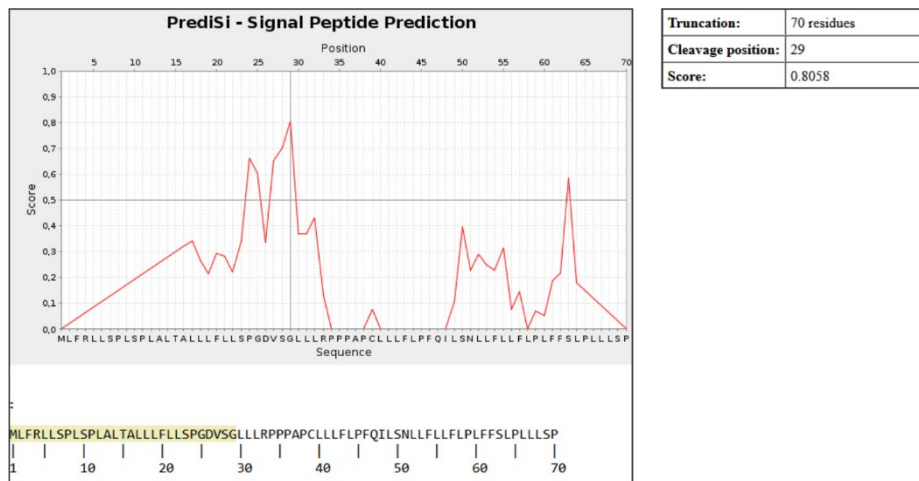

**Supplementary Figure 2: p12 is predicted to carry a signal peptide using PrediSi.**

The p12 wildtype (WT) sequence was analysed with the signal peptide prediction tool PrediSi.

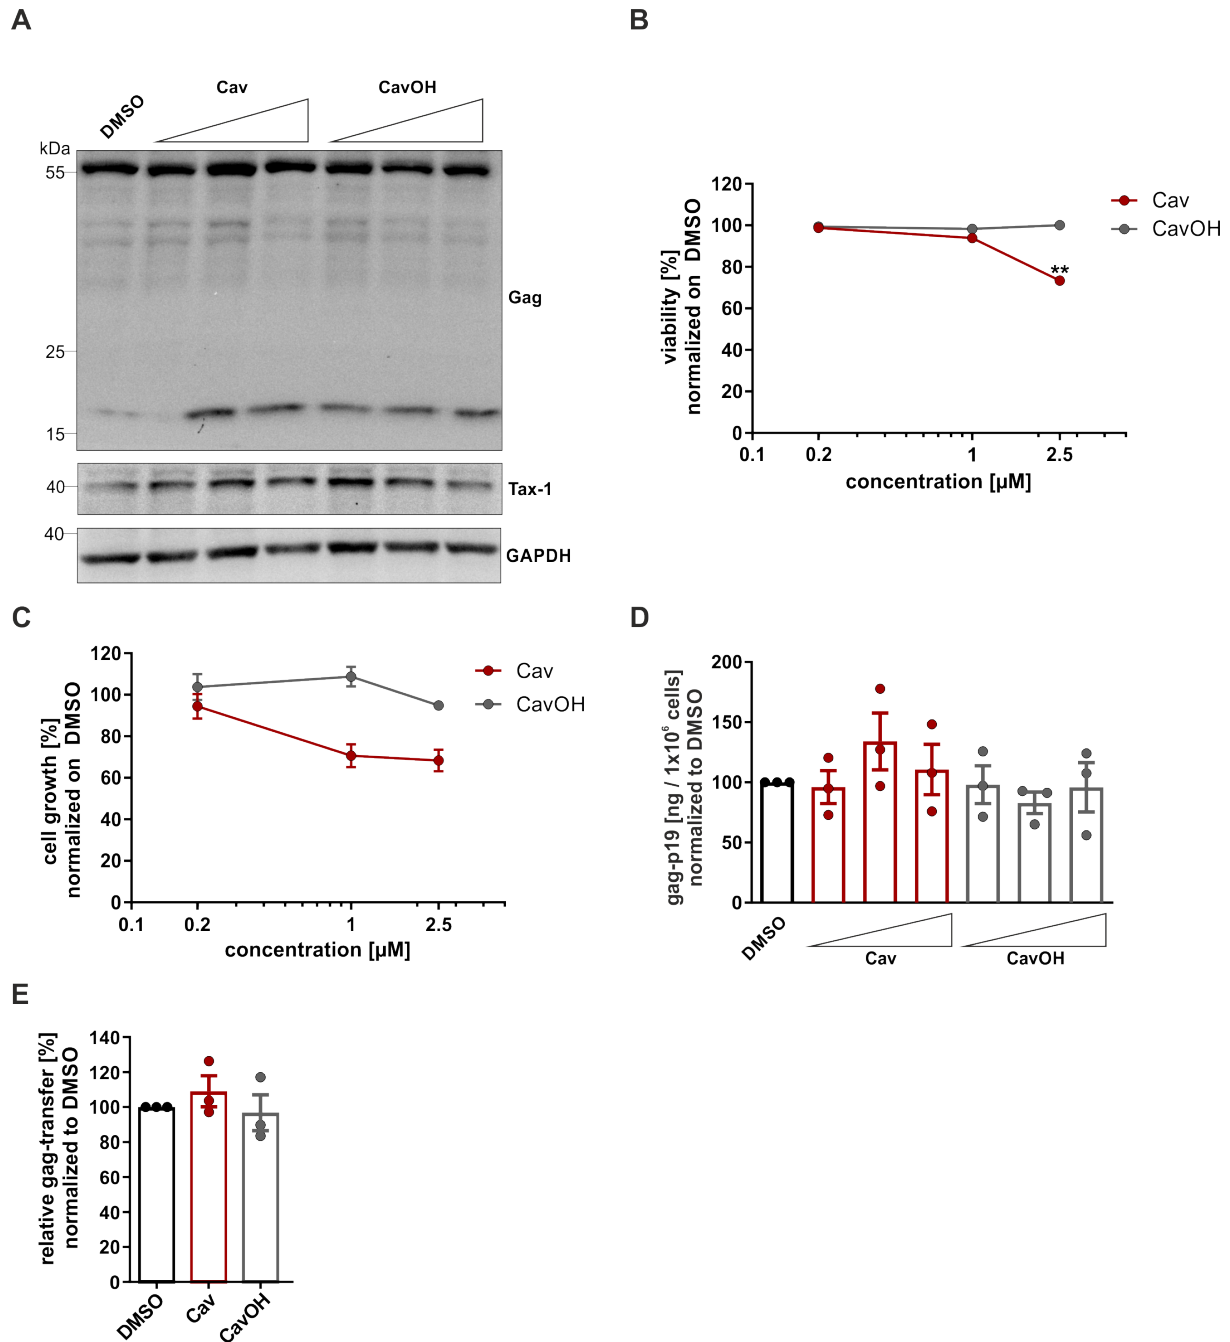

### Supplementary Figure 3: Inhibition of p12 cleavage does not affect HTLV-1 cell-to-cell transmission from C91-PL to Jurkat.

(A-D) Chronically HTLV-1 infected C91-PL cells were treated with DMSO or increasing doses (0.2 μM, 1 μM or 2.5 μM) of either Cav or CavOH. After 48 h of treatment, cells were analysed via (A) immunoblotting with anti-Gag, anti-Tax-1 and anti-GAPDH antibodies. One representative of three independent experiments is shown. (B) Cell viability was analysed via flow cytometry. (C) Cell growth was analysed via automated

47 cell counting. **(D)** Viral release was analysed via Gag-p19 ELISA. The means of three  
48 independent experiments  $\pm$  SEM are depicted. **(E)** C91-PL were treated with DMSO, 1  
49  $\mu$ M Cav or CavOH for 24 h before co-culture with Jurkat-IRES-zsGreen cells. After 1  
50 h, cells were fixed, stained intracellularly against Gag, and analysed via flow cytometry.  
51 Quantitative analysis of gag-p19-APC-positive cells normalized to DMSO control was  
52 conducted. The means of three independent experiments  $\pm$  SEM are depicted. Data  
53 were analysed by Kruskal-Wallis test followed by Dunn's multiple comparisons  
54 correction. \* $p < 0.05$ , \*\* $p < 0.01$ .
